# Supplementary material
Source: publisher figshare collection journal article supplement (https://frontiersin.figshare.com/ndownloader/files/31653530)
Supplement: Supplementary file [file 31653530]

# Hippocampus Sholl Profile Analysis

## The Mixed Procedure

| Solution for Fixed Effects |     |          |      |          |                |      |         |         |       |          |         |
|----------------------------|-----|----------|------|----------|----------------|------|---------|---------|-------|----------|---------|
| Effect                     | Sex | Genotype | Dose | Estimate | Standard Error | DF   | t Value | Pr >  t | Alpha | Lower    | Upper   |
| Intercept                  |     |          |      | 2.9680   | 0.1263         | 184  | 23.50   | <.0001  | 0.05  | 2.7188   | 3.2172  |
| Sex                        | F   |          |      | 0.05471  | 0.08887        | 35E3 | 0.62    | 0.5382  | 0.05  | -0.1195  | 0.2289  |
| Sex                        | M   |          |      | 0        | .              | .    | .       | .       | .     | .        | .       |
| Genotype                   |     | CG       |      | 0.04939  | 0.1255         | 35E3 | 0.39    | 0.6939  | 0.05  | -0.1966  | 0.2954  |
| Genotype                   |     | DM       |      | -0.01685 | 0.1261         | 35E3 | -0.13   | 0.8937  | 0.05  | -0.2641  | 0.2304  |
| Genotype                   |     | RY       |      | -0.1633  | 0.1255         | 35E3 | -1.30   | 0.1932  | 0.05  | -0.4094  | 0.08271 |
| Genotype                   |     | WT       |      | 0        | .              | .    | .       | .       | .     | .        | .       |
| Dose                       |     |          | 0.1  | 0.1027   | 0.1260         | 35E3 | 0.82    | 0.4149  | 0.05  | -0.1443  | 0.3497  |
| Dose                       |     |          | 1    | 0.1956   | 0.1257         | 35E3 | 1.56    | 0.1195  | 0.05  | -0.05065 | 0.4419  |
| Dose                       |     |          | 6    | 0.1160   | 0.1257         | 35E3 | 0.92    | 0.3561  | 0.05  | -0.1303  | 0.3623  |
| Dose                       |     |          | 0    | 0        | .              | .    | .       | .       | .     | .        | .       |

| Type 3 Tests of Fixed Effects |        |        |         |        |
|-------------------------------|--------|--------|---------|--------|
| Effect                        | Num DF | Den DF | F Value | Pr > F |
| Sex                           | 1      | 35E3   | 0.38    | 0.5382 |
| Genotype                      | 3      | 35E3   | 1.07    | 0.3616 |
| Dose                          | 3      | 35E3   | 0.82    | 0.4843 |

| Least Squares Means |     |          |      |          |                |
|---------------------|-----|----------|------|----------|----------------|
| Effect              | Sex | Genotype | Dose | Estimate | Standard Error |
| Sex                 | F   |          |      | 3.0936   | 0.06275        |
| Sex                 | M   |          |      | 3.0389   | 0.06293        |
| Genotype            |     | CG       |      | 3.1483   | 0.08854        |
| Genotype            |     | DM       |      | 3.0821   | 0.08941        |
| Genotype            |     | RY       |      | 2.9356   | 0.08858        |
| Genotype            |     | WT       |      | 3.0989   | 0.08896        |
| Dose                |     |          | 0.1  | 3.0654   | 0.08915        |
| Dose                |     |          | 1    | 3.1583   | 0.08864        |

# Hippocampus Sholl Profile Analysis

## The Mixed Procedure

| Least Squares Means |     |          |      |          |                |
|---------------------|-----|----------|------|----------|----------------|
| Effect              | Sex | Genotype | Dose | Estimate | Standard Error |
| Dose                |     |          | 6    | 3.0786   | 0.08863        |
| Dose                |     |          | 0    | 2.9627   | 0.08907        |

| Differences of Least Squares Means |     |          |      |     |          |      |          |                |      |         |         |
|------------------------------------|-----|----------|------|-----|----------|------|----------|----------------|------|---------|---------|
| Effect                             | Sex | Genotype | Dose | Sex | Genotype | Dose | Estimate | Standard Error | DF   | t Value | Pr >  t |
| Sex                                | F   |          |      | M   |          |      | 0.05471  | 0.08887        | 35E3 | 0.62    | 0.5382  |
| Genotype                           |     | CG       |      |     | DM       |      | 0.06625  | 0.1258         | 35E3 | 0.53    | 0.5986  |
| Genotype                           |     | CG       |      |     | RY       |      | 0.2127   | 0.1252         | 35E3 | 1.70    | 0.0894  |
| Genotype                           |     | CG       |      |     | WT       |      | 0.04939  | 0.1255         | 35E3 | 0.39    | 0.6939  |
| Genotype                           |     | DM       |      |     | RY       |      | 0.1465   | 0.1259         | 35E3 | 1.16    | 0.2445  |
| Genotype                           |     | DM       |      |     | WT       |      | -0.01685 | 0.1261         | 35E3 | -0.13   | 0.8937  |
| Genotype                           |     | RY       |      |     | WT       |      | -0.1633  | 0.1255         | 35E3 | -1.30   | 0.1932  |
| Dose                               |     |          | 0.1  |     |          | 1    | -0.09291 | 0.1257         | 35E3 | -0.74   | 0.4599  |
| Dose                               |     |          | 0.1  |     |          | 6    | -0.01323 | 0.1257         | 35E3 | -0.11   | 0.9162  |
| Dose                               |     |          | 0.1  |     |          | 0    | 0.1027   | 0.1260         | 35E3 | 0.82    | 0.4149  |
| Dose                               |     |          | 1    |     |          | 6    | 0.07968  | 0.1253         | 35E3 | 0.64    | 0.5250  |
| Dose                               |     |          | 1    |     |          | 0    | 0.1956   | 0.1257         | 35E3 | 1.56    | 0.1195  |
| Dose                               |     |          | 6    |     |          | 0    | 0.1160   | 0.1257         | 35E3 | 0.92    | 0.3561  |

**Mixed model for Peak X****The Mixed Procedure**

| Solution for Fixed Effects |     |          |      |          |                |     |         |         |       |         |         |
|----------------------------|-----|----------|------|----------|----------------|-----|---------|---------|-------|---------|---------|
| Effect                     | Sex | Genotype | Dose | Estimate | Standard Error | DF  | t Value | Pr >  t | Alpha | Lower   | Upper   |
| Intercept                  |     |          |      | 43.7918  | 1.3964         | 188 | 31.36   | <.0001  | 0.05  | 41.0372 | 46.5465 |
| Sex                        | F   |          |      | 0.6046   | 0.9751         | 180 | 0.62    | 0.5360  | 0.05  | -1.3194 | 2.5287  |
| Sex                        | M   |          |      | 0        | .              | .   | .       | .       | .     | .       | .       |
| Genotype                   |     | CG       |      | 3.0639   | 1.3760         | 180 | 2.23    | 0.0272  | 0.05  | 0.3487  | 5.7791  |
| Genotype                   |     | DM       |      | 1.9766   | 1.3886         | 184 | 1.42    | 0.1563  | 0.05  | -0.7630 | 4.7162  |
| Genotype                   |     | RY       |      | 0.2493   | 1.3816         | 182 | 0.18    | 0.8570  | 0.05  | -2.4767 | 2.9753  |
| Genotype                   |     | WT       |      | 0        | .              | .   | .       | .       | .     | .       | .       |
| Dose                       |     |          | 0.1  | 0.7667   | 1.3906         | 185 | 0.55    | 0.5821  | 0.05  | -1.9767 | 3.5102  |
| Dose                       |     |          | 1    | 0.8798   | 1.3790         | 181 | 0.64    | 0.5243  | 0.05  | -1.8413 | 3.6008  |
| Dose                       |     |          | 6    | 0.06706  | 1.3785         | 180 | 0.05    | 0.9613  | 0.05  | -2.6530 | 2.7871  |
| Dose                       |     |          | 0    | 0        | .              | .   | .       | .       | .     | .       | .       |

| Type 3 Tests of Fixed Effects |        |        |         |        |
|-------------------------------|--------|--------|---------|--------|
| Effect                        | Num DF | Den DF | F Value | Pr > F |
| Sex                           | 1      | 180    | 0.38    | 0.5360 |
| Genotype                      | 3      | 181    | 2.25    | 0.0846 |
| Dose                          | 3      | 181    | 0.22    | 0.8811 |

| Least Squares Means |     |          |      |          |                |
|---------------------|-----|----------|------|----------|----------------|
| Effect              | Sex | Genotype | Dose | Estimate | Standard Error |
| Sex                 | F   |          |      | 46.1473  | 0.6860         |
| Sex                 | M   |          |      | 45.5427  | 0.6932         |
| Genotype            |     | CG       |      | 47.5865  | 0.9644         |
| Genotype            |     | DM       |      | 46.4992  | 0.9824         |
| Genotype            |     | RY       |      | 44.7718  | 0.9724         |
| Genotype            |     | WT       |      | 44.5225  | 0.9815         |
| Dose                |     |          | 0.1  | 46.1833  | 0.9839         |
| Dose                |     |          | 1    | 46.2964  | 0.9673         |

**Mixed model for Peak X****The Mixed Procedure**

| Least Squares Means |     |          |      |          |                |
|---------------------|-----|----------|------|----------|----------------|
| Effect              | Sex | Genotype | Dose | Estimate | Standard Error |
| Dose                |     |          | 6    | 45.4837  | 0.9667         |
| Dose                |     |          | 0    | 45.4166  | 0.9829         |

| Differences of Least Squares Means |     |          |      |     |          |      |          |                |     |         |         |
|------------------------------------|-----|----------|------|-----|----------|------|----------|----------------|-----|---------|---------|
| Effect                             | Sex | Genotype | Dose | Sex | Genotype | Dose | Estimate | Standard Error | DF  | t Value | Pr >  t |
| Sex                                | F   |          |      | M   |          |      | 0.6046   | 0.9751         | 180 | 0.62    | 0.5360  |
| Genotype                           |     | CG       |      |     | DM       |      | 1.0873   | 1.3766         | 179 | 0.79    | 0.4307  |
| Genotype                           |     | CG       |      |     | RY       |      | 2.8146   | 1.3696         | 177 | 2.06    | 0.0413  |
| Genotype                           |     | CG       |      |     | WT       |      | 3.0639   | 1.3760         | 180 | 2.23    | 0.0272  |
| Genotype                           |     | DM       |      |     | RY       |      | 1.7273   | 1.3821         | 181 | 1.25    | 0.2130  |
| Genotype                           |     | DM       |      |     | WT       |      | 1.9766   | 1.3886         | 184 | 1.42    | 0.1563  |
| Genotype                           |     | RY       |      |     | WT       |      | 0.2493   | 1.3816         | 182 | 0.18    | 0.8570  |
| Dose                               |     |          | 0.1  |     |          | 1    | -0.1130  | 1.3797         | 181 | -0.08   | 0.9348  |
| Dose                               |     |          | 0.1  |     |          | 6    | 0.6997   | 1.3793         | 180 | 0.51    | 0.6126  |
| Dose                               |     |          | 0.1  |     |          | 0    | 0.7667   | 1.3906         | 185 | 0.55    | 0.5821  |
| Dose                               |     |          | 1    |     |          | 6    | 0.8127   | 1.3676         | 176 | 0.59    | 0.5531  |
| Dose                               |     |          | 1    |     |          | 0    | 0.8798   | 1.3790         | 181 | 0.64    | 0.5243  |
| Dose                               |     |          | 6    |     |          | 0    | 0.06706  | 1.3785         | 180 | 0.05    | 0.9613  |

**Mixed model for Peak Y****The Mixed Procedure**

| Solution for Fixed Effects |     |          |      |          |                |     |         |         |       |         |         |
|----------------------------|-----|----------|------|----------|----------------|-----|---------|---------|-------|---------|---------|
| Effect                     | Sex | Genotype | Dose | Estimate | Standard Error | DF  | t Value | Pr >  t | Alpha | Lower   | Upper   |
| Intercept                  |     |          |      | 11.4162  | 0.3090         | 191 | 36.95   | <.0001  | 0.05  | 10.8067 | 12.0256 |
| Sex                        | F   |          |      | -0.01392 | 0.2164         | 184 | -0.06   | 0.9488  | 0.05  | -0.4409 | 0.4130  |
| Sex                        | M   |          |      | 0        | .              | .   | .       | .       | .     | .       | .       |
| Genotype                   |     | CG       |      | -0.3589  | 0.3055         | 184 | -1.17   | 0.2416  | 0.05  | -0.9615 | 0.2438  |
| Genotype                   |     | DM       |      | -0.7233  | 0.3077         | 188 | -2.35   | 0.0198  | 0.05  | -1.3303 | -0.1162 |
| Genotype                   |     | RY       |      | -0.8160  | 0.3064         | 186 | -2.66   | 0.0084  | 0.05  | -1.4205 | -0.2115 |
| Genotype                   |     | WT       |      | 0        | .              | .   | .       | .       | .     | .       | .       |
| Dose                       |     |          | 0.1  | -0.04769 | 0.3081         | 188 | -0.15   | 0.8771  | 0.05  | -0.6554 | 0.5600  |
| Dose                       |     |          | 1    | 0.4368   | 0.3060         | 185 | 1.43    | 0.1551  | 0.05  | -0.1669 | 1.0405  |
| Dose                       |     |          | 6    | 0.3474   | 0.3059         | 184 | 1.14    | 0.2576  | 0.05  | -0.2562 | 0.9510  |
| Dose                       |     |          | 0    | 0        | .              | .   | .       | .       | .     | .       | .       |

| Type 3 Tests of Fixed Effects |        |        |         |        |
|-------------------------------|--------|--------|---------|--------|
| Effect                        | Num DF | Den DF | F Value | Pr > F |
| Sex                           | 1      | 184    | 0.00    | 0.9488 |
| Genotype                      | 3      | 184    | 2.95    | 0.0339 |
| Dose                          | 3      | 184    | 1.27    | 0.2868 |

| Least Squares Means |     |          |      |          |                |
|---------------------|-----|----------|------|----------|----------------|
| Effect              | Sex | Genotype | Dose | Estimate | Standard Error |
| Sex                 | F   |          |      | 11.1118  | 0.1524         |
| Sex                 | M   |          |      | 11.1258  | 0.1537         |
| Genotype            |     | CG       |      | 11.2345  | 0.2145         |
| Genotype            |     | DM       |      | 10.8701  | 0.2178         |
| Genotype            |     | RY       |      | 10.7773  | 0.2159         |
| Genotype            |     | WT       |      | 11.5933  | 0.2175         |
| Dose                |     |          | 0.1  | 10.8870  | 0.2180         |
| Dose                |     |          | 1    | 11.3715  | 0.2150         |

**Mixed model for Peak Y****The Mixed Procedure**

| Least Squares Means |     |          |      |          |                |
|---------------------|-----|----------|------|----------|----------------|
| Effect              | Sex | Genotype | Dose | Estimate | Standard Error |
| Dose                |     |          | 6    | 11.2821  | 0.2150         |
| Dose                |     |          | 0    | 10.9347  | 0.2177         |

| Differences of Least Squares Means |     |          |      |     |          |      |          |                |     |         |         |
|------------------------------------|-----|----------|------|-----|----------|------|----------|----------------|-----|---------|---------|
| Effect                             | Sex | Genotype | Dose | Sex | Genotype | Dose | Estimate | Standard Error | DF  | t Value | Pr >  t |
| Sex                                | F   |          |      | M   |          |      | -0.01392 | 0.2164         | 184 | -0.06   | 0.9488  |
| Genotype                           |     | CG       |      |     | DM       |      | 0.3644   | 0.3057         | 183 | 1.19    | 0.2348  |
| Genotype                           |     | CG       |      |     | RY       |      | 0.4571   | 0.3044         | 181 | 1.50    | 0.1349  |
| Genotype                           |     | CG       |      |     | WT       |      | -0.3589  | 0.3055         | 184 | -1.17   | 0.2416  |
| Genotype                           |     | DM       |      |     | RY       |      | 0.09274  | 0.3066         | 185 | 0.30    | 0.7627  |
| Genotype                           |     | DM       |      |     | WT       |      | -0.7233  | 0.3077         | 188 | -2.35   | 0.0198  |
| Genotype                           |     | RY       |      |     | WT       |      | -0.8160  | 0.3064         | 186 | -2.66   | 0.0084  |
| Dose                               |     |          | 0.1  |     |          | 1    | -0.4845  | 0.3062         | 185 | -1.58   | 0.1152  |
| Dose                               |     |          | 0.1  |     |          | 6    | -0.3951  | 0.3061         | 184 | -1.29   | 0.1984  |
| Dose                               |     |          | 0.1  |     |          | 0    | -0.04769 | 0.3081         | 188 | -0.15   | 0.8771  |
| Dose                               |     |          | 1    |     |          | 6    | 0.08943  | 0.3040         | 181 | 0.29    | 0.7690  |
| Dose                               |     |          | 1    |     |          | 0    | 0.4368   | 0.3060         | 185 | 1.43    | 0.1551  |
| Dose                               |     |          | 6    |     |          | 0    | 0.3474   | 0.3059         | 184 | 1.14    | 0.2576  |

**Mixed model for AUC total****The Mixed Procedure**

| Solution for Fixed Effects |     |          |      |          |                |     |         |         |       |          |         |
|----------------------------|-----|----------|------|----------|----------------|-----|---------|---------|-------|----------|---------|
| Effect                     | Sex | Genotype | Dose | Estimate | Standard Error | DF  | t Value | Pr >  t | Alpha | Lower    | Upper   |
| Intercept                  |     |          |      | 746.71   | 31.4671        | 188 | 23.73   | <.0001  | 0.05  | 684.64   | 808.79  |
| Sex                        | F   |          |      | 5.9542   | 22.1011        | 183 | 0.27    | 0.7879  | 0.05  | -37.6508 | 49.5592 |
| Sex                        | M   |          |      | 0        | .              | .   | .       | .       | .     | .        | .       |
| Genotype                   |     | CG       |      | 14.0228  | 31.2061        | 183 | 0.45    | 0.6537  | 0.05  | -47.5477 | 75.5932 |
| Genotype                   |     | DM       |      | -11.0598 | 31.3835        | 186 | -0.35   | 0.7249  | 0.05  | -72.9737 | 50.8540 |
| Genotype                   |     | RY       |      | -37.8532 | 31.2792        | 184 | -1.21   | 0.2278  | 0.05  | -99.5647 | 23.8584 |
| Genotype                   |     | WT       |      | 0        | .              | .   | .       | .       | .     | .        | .       |
| Dose                       |     |          | 0.1  | 23.1477  | 31.4071        | 186 | 0.74    | 0.4620  | 0.05  | -38.8115 | 85.1068 |
| Dose                       |     |          | 1    | 48.8843  | 31.2477        | 184 | 1.56    | 0.1194  | 0.05  | -12.7665 | 110.54  |
| Dose                       |     |          | 6    | 34.4834  | 31.2459        | 183 | 1.10    | 0.2712  | 0.05  | -27.1644 | 96.1313 |
| Dose                       |     |          | 0    | 0        | .              | .   | .       | .       | .     | .        | .       |

| Type 3 Tests of Fixed Effects |        |        |         |        |
|-------------------------------|--------|--------|---------|--------|
| Effect                        | Num DF | Den DF | F Value | Pr > F |
| Sex                           | 1      | 183    | 0.07    | 0.7879 |
| Genotype                      | 3      | 183    | 0.99    | 0.3969 |
| Dose                          | 3      | 183    | 0.87    | 0.4568 |

| Least Squares Means |     |          |      |          |                |
|---------------------|-----|----------|------|----------|----------------|
| Effect              | Sex | Genotype | Dose | Estimate | Standard Error |
| Sex                 | F   |          |      | 770.57   | 15.5760        |
| Sex                 | M   |          |      | 764.62   | 15.6804        |
| Genotype            |     | CG       |      | 790.34   | 21.9587        |
| Genotype            |     | DM       |      | 765.26   | 22.2112        |
| Genotype            |     | RY       |      | 738.46   | 22.0630        |
| Genotype            |     | WT       |      | 776.32   | 22.1730        |
| Dose                |     |          | 0.1  | 764.11   | 22.2222        |
| Dose                |     |          | 1    | 789.85   | 21.9950        |

*Mixed model for AUC total**The Mixed Procedure*

| Least Squares Means |     |          |      |          |                |
|---------------------|-----|----------|------|----------|----------------|
| Effect              | Sex | Genotype | Dose | Estimate | Standard Error |
| Dose                |     |          | 6    | 775.45   | 21.9933        |
| Dose                |     |          | 0    | 740.97   | 22.1955        |

| Differences of Least Squares Means |     |          |      |     |          |      |          |                |     |         |         |
|------------------------------------|-----|----------|------|-----|----------|------|----------|----------------|-----|---------|---------|
| Effect                             | Sex | Genotype | Dose | Sex | Genotype | Dose | Estimate | Standard Error | DF  | t Value | Pr >  t |
| Sex                                | F   |          |      | M   |          |      | 5.9542   | 22.1011        | 183 | 0.27    | 0.7879  |
| Genotype                           |     | CG       |      |     | DM       |      | 25.0826  | 31.2333        | 183 | 0.80    | 0.4230  |
| Genotype                           |     | CG       |      |     | RY       |      | 51.8760  | 31.1285        | 181 | 1.67    | 0.0973  |
| Genotype                           |     | CG       |      |     | WT       |      | 14.0228  | 31.2061        | 183 | 0.45    | 0.6537  |
| Genotype                           |     | DM       |      |     | RY       |      | 26.7933  | 31.3059        | 184 | 0.86    | 0.3932  |
| Genotype                           |     | DM       |      |     | WT       |      | -11.0598 | 31.3835        | 186 | -0.35   | 0.7249  |
| Genotype                           |     | RY       |      |     | WT       |      | -37.8532 | 31.2792        | 184 | -1.21   | 0.2278  |
| Dose                               |     |          | 0.1  |     |          | 1    | -25.7367 | 31.2665        | 183 | -0.82   | 0.4115  |
| Dose                               |     |          | 0.1  |     |          | 6    | -11.3357 | 31.2650        | 183 | -0.36   | 0.7173  |
| Dose                               |     |          | 0.1  |     |          | 0    | 23.1477  | 31.4071        | 186 | 0.74    | 0.4620  |
| Dose                               |     |          | 1    |     |          | 6    | 14.4009  | 31.1048        | 181 | 0.46    | 0.6439  |
| Dose                               |     |          | 1    |     |          | 0    | 48.8843  | 31.2477        | 184 | 1.56    | 0.1194  |
| Dose                               |     |          | 6    |     |          | 0    | 34.4834  | 31.2459        | 183 | 1.10    | 0.2712  |



**Mixed model for AUC proximal****The Mixed Procedure**

| Solution for Fixed Effects |     |          |      |          |                |     |         |         |       |          |         |
|----------------------------|-----|----------|------|----------|----------------|-----|---------|---------|-------|----------|---------|
| Effect                     | Sex | Genotype | Dose | Estimate | Standard Error | DF  | t Value | Pr >  t | Alpha | Lower    | Upper   |
| Intercept                  |     |          |      | 484.22   | 14.2223        | 189 | 34.05   | <.0001  | 0.05  | 456.17   | 512.28  |
| Sex                        | F   |          |      | -1.6078  | 9.9701         | 184 | -0.16   | 0.8721  | 0.05  | -21.2786 | 18.0629 |
| Sex                        | M   |          |      | 0        | .              | .   | .       | .       | .     | .        | .       |
| Genotype                   |     | CG       |      | -13.6199 | 14.0742        | 183 | -0.97   | 0.3345  | 0.05  | -41.3887 | 14.1488 |
| Genotype                   |     | DM       |      | -24.2883 | 14.1711        | 186 | -1.71   | 0.0882  | 0.05  | -52.2446 | 3.6680  |
| Genotype                   |     | RY       |      | -28.3528 | 14.1153        | 185 | -2.01   | 0.0460  | 0.05  | -56.2009 | -0.5047 |
| Genotype                   |     | WT       |      | 0        | .              | .   | .       | .       | .     | .        | .       |
| Dose                       |     |          | 0.1  | 1.7967   | 14.1848        | 187 | 0.13    | 0.8993  | 0.05  | -26.1859 | 29.7794 |
| Dose                       |     |          | 1    | 21.9820  | 14.0972        | 184 | 1.56    | 0.1206  | 0.05  | -5.8312  | 49.7952 |
| Dose                       |     |          | 6    | 14.3171  | 14.0953        | 183 | 1.02    | 0.3111  | 0.05  | -13.4925 | 42.1267 |
| Dose                       |     |          | 0    | 0        | .              | .   | .       | .       | .     | .        | .       |

| Type 3 Tests of Fixed Effects |        |        |         |        |
|-------------------------------|--------|--------|---------|--------|
| Effect                        | Num DF | Den DF | F Value | Pr > F |
| Sex                           | 1      | 184    | 0.03    | 0.8721 |
| Genotype                      | 3      | 184    | 1.61    | 0.1892 |
| Dose                          | 3      | 184    | 1.10    | 0.3493 |

| Least Squares Means |     |          |      |          |                |
|---------------------|-----|----------|------|----------|----------------|
| Effect              | Sex | Genotype | Dose | Estimate | Standard Error |
| Sex                 | F   |          |      | 475.58   | 7.0219         |
| Sex                 | M   |          |      | 477.18   | 7.0785         |
| Genotype            |     | CG       |      | 479.32   | 9.8906         |
| Genotype            |     | DM       |      | 468.66   | 10.0286        |
| Genotype            |     | RY       |      | 464.59   | 9.9493         |
| Genotype            |     | WT       |      | 492.94   | 10.0132        |
| Dose                |     |          | 0.1  | 468.65   | 10.0364        |
| Dose                |     |          | 1    | 488.84   | 9.9114         |

*Mixed model for AUC proximal**The Mixed Procedure*

| Least Squares Means |     |          |      |          |                |
|---------------------|-----|----------|------|----------|----------------|
| Effect              | Sex | Genotype | Dose | Estimate | Standard Error |
| Dose                |     |          | 6    | 481.17   | 9.9091         |
| Dose                |     |          | 0    | 466.86   | 10.0248        |

| Differences of Least Squares Means |     |          |      |     |          |      |          |                |     |         |         |
|------------------------------------|-----|----------|------|-----|----------|------|----------|----------------|-----|---------|---------|
| Effect                             | Sex | Genotype | Dose | Sex | Genotype | Dose | Estimate | Standard Error | DF  | t Value | Pr >  t |
| Sex                                | F   |          |      | M   |          |      | -1.6078  | 9.9701         | 184 | -0.16   | 0.8721  |
| Genotype                           |     | CG       |      |     | DM       |      | 10.6684  | 14.0853        | 183 | 0.76    | 0.4498  |
| Genotype                           |     | CG       |      |     | RY       |      | 14.7329  | 14.0292        | 181 | 1.05    | 0.2950  |
| Genotype                           |     | CG       |      |     | WT       |      | -13.6199 | 14.0742        | 183 | -0.97   | 0.3345  |
| Genotype                           |     | DM       |      |     | RY       |      | 4.0645   | 14.1260        | 184 | 0.29    | 0.7739  |
| Genotype                           |     | DM       |      |     | WT       |      | -24.2883 | 14.1711        | 186 | -1.71   | 0.0882  |
| Genotype                           |     | RY       |      |     | WT       |      | -28.3528 | 14.1153        | 185 | -2.01   | 0.0460  |
| Dose                               |     |          | 0.1  |     |          | 1    | -20.1852 | 14.1054        | 184 | -1.43   | 0.1541  |
| Dose                               |     |          | 0.1  |     |          | 6    | -12.5204 | 14.1036        | 183 | -0.89   | 0.3758  |
| Dose                               |     |          | 0.1  |     |          | 0    | 1.7967   | 14.1848        | 187 | 0.13    | 0.8993  |
| Dose                               |     |          | 1    |     |          | 6    | 7.6648   | 14.0155        | 180 | 0.55    | 0.5851  |
| Dose                               |     |          | 1    |     |          | 0    | 21.9820  | 14.0972        | 184 | 1.56    | 0.1206  |
| Dose                               |     |          | 6    |     |          | 0    | 14.3171  | 14.0953        | 183 | 1.02    | 0.3111  |

*Mixed model for AUC distal**The Mixed Procedure*

| Solution for Fixed Effects |     |          |      |          |                |     |         |         |       |          |         |
|----------------------------|-----|----------|------|----------|----------------|-----|---------|---------|-------|----------|---------|
| Effect                     | Sex | Genotype | Dose | Estimate | Standard Error | DF  | t Value | Pr >  t | Alpha | Lower    | Upper   |
| Intercept                  |     |          |      | 2.1624   | 0.05113        | 185 | 42.29   | <.0001  | 0.05  | 2.0616   | 2.2633  |
| Sex                        | F   |          |      | -0.05370 | 0.06132        | 181 | -0.88   | 0.3823  | 0.05  | -0.1747  | 0.06729 |
| Sex                        | M   |          |      | 0        | .              | .   | .       | .       | .     | .        | .       |
| Genotype                   |     | CG       |      | -0.02750 | 0.06107        | 179 | -0.45   | 0.6531  | 0.05  | -0.1480  | 0.09302 |
| Genotype                   |     | DM       |      | 0.06986  | 0.06171        | 184 | 1.13    | 0.2591  | 0.05  | -0.05189 | 0.1916  |
| Genotype                   |     | RY       |      | -0.06110 | 0.06131        | 181 | -1.00   | 0.3203  | 0.05  | -0.1821  | 0.05987 |
| Genotype                   |     | WT       |      | 0        | .              | .   | .       | .       | .     | .        | .       |
| Dose                       |     |          | 0.1  | 0.03937  | 0.04343        | 182 | 0.91    | 0.3659  | 0.05  | -0.04633 | 0.1251  |
| Dose                       |     |          | 1    | 0.03409  | 0.04320        | 179 | 0.79    | 0.4311  | 0.05  | -0.05116 | 0.1193  |
| Dose                       |     |          | 6    | 0.01600  | 0.04320        | 179 | 0.37    | 0.7116  | 0.05  | -0.06925 | 0.1012  |
| Dose                       |     |          | 0    | 0        | .              | .   | .       | .       | .     | .        | .       |
| Sex*Genotype               | F   | CG       |      | 0.1792   | 0.08628        | 178 | 2.08    | 0.0392  | 0.05  | 0.008936 | 0.3495  |
| Sex*Genotype               | F   | DM       |      | -0.04497 | 0.08680        | 181 | -0.52   | 0.6050  | 0.05  | -0.2162  | 0.1263  |
| Sex*Genotype               | F   | RY       |      | 0.1370   | 0.08649        | 180 | 1.58    | 0.1149  | 0.05  | -0.03364 | 0.3077  |
| Sex*Genotype               | F   | WT       |      | 0        | .              | .   | .       | .       | .     | .        | .       |
| Sex*Genotype               | M   | CG       |      | 0        | .              | .   | .       | .       | .     | .        | .       |
| Sex*Genotype               | M   | DM       |      | 0        | .              | .   | .       | .       | .     | .        | .       |
| Sex*Genotype               | M   | RY       |      | 0        | .              | .   | .       | .       | .     | .        | .       |
| Sex*Genotype               | M   | WT       |      | 0        | .              | .   | .       | .       | .     | .        | .       |

| Type 3 Tests of Fixed Effects |        |        |         |        |
|-------------------------------|--------|--------|---------|--------|
| Effect                        | Num DF | Den DF | F Value | Pr > F |
| Sex                           | 1      | 179    | 0.21    | 0.6448 |
| Genotype                      | 3      | 179    | 0.98    | 0.4030 |
| Dose                          | 3      | 179    | 0.34    | 0.7941 |
| Sex*Genotype                  | 3      | 179    | 3.08    | 0.0287 |

*Mixed model for AUC distal**The Mixed Procedure*

| Least Squares Means |     |          |          |                |
|---------------------|-----|----------|----------|----------------|
| Effect              | Sex | Genotype | Estimate | Standard Error |
| Sex                 | F   |          | 2.1942   | 0.02153        |
| Sex                 | M   |          | 2.1801   | 0.02168        |
| Genotype            |     | CG       | 2.2200   | 0.03035        |
| Genotype            |     | DM       | 2.2053   | 0.03072        |
| Genotype            |     | RY       | 2.1654   | 0.03050        |
| Genotype            |     | WT       | 2.1579   | 0.03066        |
| Sex*Genotype        | F   | CG       | 2.2828   | 0.04291        |
| Sex*Genotype        | F   | DM       | 2.1560   | 0.04305        |
| Sex*Genotype        | F   | RY       | 2.2070   | 0.04301        |
| Sex*Genotype        | F   | WT       | 2.1311   | 0.04327        |
| Sex*Genotype        | M   | CG       | 2.1573   | 0.04292        |
| Sex*Genotype        | M   | DM       | 2.2547   | 0.04383        |
| Sex*Genotype        | M   | RY       | 2.1237   | 0.04326        |
| Sex*Genotype        | M   | WT       | 2.1848   | 0.04345        |

| Differences of Least Squares Means |     |          |     |          |          |                |     |         |         |
|------------------------------------|-----|----------|-----|----------|----------|----------------|-----|---------|---------|
| Effect                             | Sex | Genotype | Sex | Genotype | Estimate | Standard Error | DF  | t Value | Pr >  t |
| Sex                                | F   |          | M   |          | 0.01411  | 0.03056        | 179 | 0.46    | 0.6448  |
| Genotype                           |     | CG       |     | DM       | 0.01472  | 0.04318        | 178 | 0.34    | 0.7336  |
| Genotype                           |     | CG       |     | RY       | 0.05469  | 0.04302        | 176 | 1.27    | 0.2053  |
| Genotype                           |     | CG       |     | WT       | 0.06210  | 0.04314        | 178 | 1.44    | 0.1517  |
| Genotype                           |     | DM       |     | RY       | 0.03997  | 0.04329        | 180 | 0.92    | 0.3570  |
| Genotype                           |     | DM       |     | WT       | 0.04738  | 0.04340        | 181 | 1.09    | 0.2764  |
| Genotype                           |     | RY       |     | WT       | 0.007410 | 0.04325        | 180 | 0.17    | 0.8641  |
| Sex*Genotype                       | F   | CG       | F   | DM       | 0.1268   | 0.06079        | 176 | 2.09    | 0.0384  |
| Sex*Genotype                       | F   | CG       | F   | RY       | 0.07577  | 0.06075        | 176 | 1.25    | 0.2140  |
| Sex*Genotype                       | F   | CG       | F   | WT       | 0.1517   | 0.06094        | 178 | 2.49    | 0.0137  |
| Sex*Genotype                       | F   | CG       | M   | CG       | 0.1255   | 0.06069        | 175 | 2.07    | 0.0401  |
| Sex*Genotype                       | F   | CG       | M   | DM       | 0.02813  | 0.06134        | 180 | 0.46    | 0.6470  |
| Sex*Genotype                       | F   | CG       | M   | RY       | 0.1591   | 0.06093        | 177 | 2.61    | 0.0098  |
| Sex*Genotype                       | F   | CG       | M   | WT       | 0.09800  | 0.06107        | 179 | 1.60    | 0.1103  |

*Mixed model for AUC distal**The Mixed Procedure*

| Differences of Least Squares Means |     |          |     |          |          |                |     |         |         |
|------------------------------------|-----|----------|-----|----------|----------|----------------|-----|---------|---------|
| Effect                             | Sex | Genotype | Sex | Genotype | Estimate | Standard Error | DF  | t Value | Pr >  t |
| Sex*Genotype                       | F   | DM       | F   | RY       | -0.05103 | 0.06085        | 177 | -0.84   | 0.4028  |
| Sex*Genotype                       | F   | DM       | F   | WT       | 0.02490  | 0.06104        | 179 | 0.41    | 0.6839  |
| Sex*Genotype                       | F   | DM       | M   | CG       | -0.00131 | 0.06079        | 176 | -0.02   | 0.9828  |
| Sex*Genotype                       | F   | DM       | M   | DM       | -0.09867 | 0.06144        | 181 | -1.61   | 0.1100  |
| Sex*Genotype                       | F   | DM       | M   | RY       | 0.03230  | 0.06103        | 178 | 0.53    | 0.5973  |
| Sex*Genotype                       | F   | DM       | M   | WT       | -0.02881 | 0.06117        | 180 | -0.47   | 0.6382  |
| Sex*Genotype                       | F   | RY       | F   | WT       | 0.07593  | 0.06101        | 178 | 1.24    | 0.2149  |
| Sex*Genotype                       | F   | RY       | M   | CG       | 0.04972  | 0.06076        | 176 | 0.82    | 0.4143  |
| Sex*Genotype                       | F   | RY       | M   | DM       | -0.04764 | 0.06140        | 181 | -0.78   | 0.4388  |
| Sex*Genotype                       | F   | RY       | M   | RY       | 0.08333  | 0.06100        | 178 | 1.37    | 0.1736  |
| Sex*Genotype                       | F   | RY       | M   | WT       | 0.02222  | 0.06113        | 179 | 0.36    | 0.7166  |
| Sex*Genotype                       | F   | WT       | M   | CG       | -0.02621 | 0.06095        | 178 | -0.43   | 0.6677  |
| Sex*Genotype                       | F   | WT       | M   | DM       | -0.1236  | 0.06159        | 183 | -2.01   | 0.0463  |
| Sex*Genotype                       | F   | WT       | M   | RY       | 0.007403 | 0.06119        | 180 | 0.12    | 0.9038  |
| Sex*Genotype                       | F   | WT       | M   | WT       | -0.05370 | 0.06132        | 181 | -0.88   | 0.3823  |
| Sex*Genotype                       | M   | CG       | M   | DM       | -0.09736 | 0.06134        | 180 | -1.59   | 0.1142  |
| Sex*Genotype                       | M   | CG       | M   | RY       | 0.03361  | 0.06094        | 177 | 0.55    | 0.5820  |
| Sex*Genotype                       | M   | CG       | M   | WT       | -0.02750 | 0.06107        | 179 | -0.45   | 0.6531  |
| Sex*Genotype                       | M   | DM       | M   | RY       | 0.1310   | 0.06158        | 182 | 2.13    | 0.0348  |
| Sex*Genotype                       | M   | DM       | M   | WT       | 0.06986  | 0.06171        | 184 | 1.13    | 0.2591  |
| Sex*Genotype                       | M   | RY       | M   | WT       | -0.06110 | 0.06131        | 181 | -1.00   | 0.3203  |

**Mixed Effects Model for Total Dendrites****The Mixed Procedure**

| Solution for Fixed Effects |     |          |      |          |                |     |         |         |       |         |          |
|----------------------------|-----|----------|------|----------|----------------|-----|---------|---------|-------|---------|----------|
| Effect                     | Sex | Genotype | Dose | Estimate | Standard Error | DF  | t Value | Pr >  t | Alpha | Lower   | Upper    |
| Intercept                  |     |          |      | 4.2803   | 0.1167         | 191 | 36.68   | <.0001  | 0.05  | 4.0501  | 4.5105   |
| Sex                        | F   |          |      | -0.03366 | 0.08143        | 183 | -0.41   | 0.6798  | 0.05  | -0.1943 | 0.1270   |
| Sex                        | M   |          |      | 0        | .              | .   | .       | .       | .     | .       | .        |
| Genotype                   |     | CG       |      | -0.2756  | 0.1149         | 182 | -2.40   | 0.0175  | 0.05  | -0.5023 | -0.04888 |
| Genotype                   |     | DM       |      | -0.3929  | 0.1160         | 187 | -3.39   | 0.0009  | 0.05  | -0.6217 | -0.1640  |
| Genotype                   |     | RY       |      | -0.3514  | 0.1154         | 185 | -3.04   | 0.0027  | 0.05  | -0.5790 | -0.1237  |
| Genotype                   |     | WT       |      | 0        | .              | .   | .       | .       | .     | .       | .        |
| Dose                       |     |          | 0.1  | -0.09712 | 0.1162         | 188 | -0.84   | 0.4043  | 0.05  | -0.3263 | 0.1321   |
| Dose                       |     |          | 1    | -0.01217 | 0.1152         | 183 | -0.11   | 0.9160  | 0.05  | -0.2394 | 0.2151   |
| Dose                       |     |          | 6    | 0.09735  | 0.1151         | 183 | 0.85    | 0.3988  | 0.05  | -0.1298 | 0.3245   |
| Dose                       |     |          | 0    | 0        | .              | .   | .       | .       | .     | .       | .        |

| Type 3 Tests of Fixed Effects |        |        |         |        |
|-------------------------------|--------|--------|---------|--------|
| Effect                        | Num DF | Den DF | F Value | Pr > F |
| Sex                           | 1      | 183    | 0.17    | 0.6798 |
| Genotype                      | 3      | 183    | 4.66    | 0.0037 |
| Dose                          | 3      | 183    | 0.96    | 0.4142 |

| Least Squares Means |     |          |      |          |                |
|---------------------|-----|----------|------|----------|----------------|
| Effect              | Sex | Genotype | Dose | Estimate | Standard Error |
| Sex                 | F   |          |      | 3.9887   | 0.05727        |
| Sex                 | M   |          |      | 4.0223   | 0.05790        |
| Genotype            |     | CG       |      | 3.9849   | 0.08049        |
| Genotype            |     | DM       |      | 3.8676   | 0.08206        |
| Genotype            |     | RY       |      | 3.9091   | 0.08120        |
| Genotype            |     | WT       |      | 4.2605   | 0.08201        |
| Dose                |     |          | 0.1  | 3.9114   | 0.08221        |
| Dose                |     |          | 1    | 3.9963   | 0.08075        |

*Mixed Effects Model for Total Dendrites**The Mixed Procedure*

| Least Squares Means |     |          |      |          |                |
|---------------------|-----|----------|------|----------|----------------|
| Effect              | Sex | Genotype | Dose | Estimate | Standard Error |
| Dose                |     |          | 6    | 4.1058   | 0.08069        |
| Dose                |     |          | 0    | 4.0085   | 0.08212        |

| Differences of Least Squares Means |     |          |      |     |          |      |          |                |     |         |         |
|------------------------------------|-----|----------|------|-----|----------|------|----------|----------------|-----|---------|---------|
| Effect                             | Sex | Genotype | Dose | Sex | Genotype | Dose | Estimate | Standard Error | DF  | t Value | Pr >  t |
| Sex                                | F   |          |      | M   |          |      | -0.03366 | 0.08143        | 183 | -0.41   | 0.6798  |
| Genotype                           |     | CG       |      |     | DM       |      | 0.1173   | 0.1150         | 182 | 1.02    | 0.3089  |
| Genotype                           |     | CG       |      |     | RY       |      | 0.07576  | 0.1143         | 179 | 0.66    | 0.5084  |
| Genotype                           |     | CG       |      |     | WT       |      | -0.2756  | 0.1149         | 182 | -2.40   | 0.0175  |
| Genotype                           |     | DM       |      |     | RY       |      | -0.04153 | 0.1154         | 184 | -0.36   | 0.7194  |
| Genotype                           |     | DM       |      |     | WT       |      | -0.3929  | 0.1160         | 187 | -3.39   | 0.0009  |
| Genotype                           |     | RY       |      |     | WT       |      | -0.3514  | 0.1154         | 185 | -3.04   | 0.0027  |
| Dose                               |     |          | 0.1  |     |          | 1    | -0.08496 | 0.1152         | 183 | -0.74   | 0.4619  |
| Dose                               |     |          | 0.1  |     |          | 6    | -0.1945  | 0.1152         | 183 | -1.69   | 0.0930  |
| Dose                               |     |          | 0.1  |     |          | 0    | -0.09712 | 0.1162         | 188 | -0.84   | 0.4043  |
| Dose                               |     |          | 1    |     |          | 6    | -0.1095  | 0.1142         | 178 | -0.96   | 0.3387  |
| Dose                               |     |          | 1    |     |          | 0    | -0.01217 | 0.1152         | 183 | -0.11   | 0.9160  |
| Dose                               |     |          | 6    |     |          | 0    | 0.09735  | 0.1151         | 183 | 0.85    | 0.3988  |

**Mixed Effects Model for terminal tips****The Mixed Procedure**

| Solution for Fixed Effects |     |          |      |          |                |     |         |         |       |         |          |
|----------------------------|-----|----------|------|----------|----------------|-----|---------|---------|-------|---------|----------|
| Effect                     | Sex | Genotype | Dose | Estimate | Standard Error | DF  | t Value | Pr >  t | Alpha | Lower   | Upper    |
| Intercept                  |     |          |      | 15.4589  | 0.4666         | 190 | 33.13   | <.0001  | 0.05  | 14.5386 | 16.3792  |
| Sex                        | F   |          |      | -0.08898 | 0.3271         | 184 | -0.27   | 0.7859  | 0.05  | -0.7343 | 0.5564   |
| Sex                        | M   |          |      | 0        | .              | .   | .       | .       | .     | .       | .        |
| Genotype                   |     | CG       |      | -0.08570 | 0.4617         | 184 | -0.19   | 0.8530  | 0.05  | -0.9967 | 0.8253   |
| Genotype                   |     | DM       |      | -0.8187  | 0.4649         | 187 | -1.76   | 0.0799  | 0.05  | -1.7358 | 0.09845  |
| Genotype                   |     | RY       |      | -0.9146  | 0.4631         | 185 | -1.98   | 0.0497  | 0.05  | -1.8282 | -0.00103 |
| Genotype                   |     | WT       |      | 0        | .              | .   | .       | .       | .     | .       | .        |
| Dose                       |     |          | 0.1  | 0.1680   | 0.4653         | 188 | 0.36    | 0.7185  | 0.05  | -0.7500 | 1.0860   |
| Dose                       |     |          | 1    | 0.5770   | 0.4625         | 185 | 1.25    | 0.2138  | 0.05  | -0.3355 | 1.4895   |
| Dose                       |     |          | 6    | 0.3821   | 0.4624         | 184 | 0.83    | 0.4097  | 0.05  | -0.5303 | 1.2944   |
| Dose                       |     |          | 0    | 0        | .              | .   | .       | .       | .     | .       | .        |

| Type 3 Tests of Fixed Effects |        |        |         |        |
|-------------------------------|--------|--------|---------|--------|
| Effect                        | Num DF | Den DF | F Value | Pr > F |
| Sex                           | 1      | 184    | 0.07    | 0.7859 |
| Genotype                      | 3      | 184    | 2.14    | 0.0968 |
| Dose                          | 3      | 184    | 0.59    | 0.6217 |

| Least Squares Means |     |          |      |          |                |
|---------------------|-----|----------|------|----------|----------------|
| Effect              | Sex | Genotype | Dose | Estimate | Standard Error |
| Sex                 | F   |          |      | 15.1969  | 0.2304         |
| Sex                 | M   |          |      | 15.2859  | 0.2322         |
| Genotype            |     | CG       |      | 15.6105  | 0.3245         |
| Genotype            |     | DM       |      | 14.8775  | 0.3290         |
| Genotype            |     | RY       |      | 14.7816  | 0.3264         |
| Genotype            |     | WT       |      | 15.6962  | 0.3285         |
| Dose                |     |          | 0.1  | 15.1277  | 0.3293         |
| Dose                |     |          | 1    | 15.5367  | 0.3252         |



***Mixed Effects Model for terminal tips******The Mixed Procedure***

| Least Squares Means |     |          |      |          |                |
|---------------------|-----|----------|------|----------|----------------|
| Effect              | Sex | Genotype | Dose | Estimate | Standard Error |
| Dose                |     |          | 6    | 15.3417  | 0.3251         |
| Dose                |     |          | 0    | 14.9597  | 0.3289         |

| Differences of Least Squares Means |     |          |      |     |          |      |          |                |     |         |         |
|------------------------------------|-----|----------|------|-----|----------|------|----------|----------------|-----|---------|---------|
| Effect                             | Sex | Genotype | Dose | Sex | Genotype | Dose | Estimate | Standard Error | DF  | t Value | Pr >  t |
| Sex                                | F   |          |      | M   |          |      | -0.08898 | 0.3271         | 184 | -0.27   | 0.7859  |
| Genotype                           |     | CG       |      |     | DM       |      | 0.7330   | 0.4621         | 183 | 1.59    | 0.1144  |
| Genotype                           |     | CG       |      |     | RY       |      | 0.8289   | 0.4603         | 182 | 1.80    | 0.0734  |
| Genotype                           |     | CG       |      |     | WT       |      | -0.08570 | 0.4617         | 184 | -0.19   | 0.8530  |
| Genotype                           |     | DM       |      |     | RY       |      | 0.09595  | 0.4634         | 185 | 0.21    | 0.8362  |
| Genotype                           |     | DM       |      |     | WT       |      | -0.8187  | 0.4649         | 187 | -1.76   | 0.0799  |
| Genotype                           |     | RY       |      |     | WT       |      | -0.9146  | 0.4631         | 185 | -1.98   | 0.0497  |
| Dose                               |     |          | 0.1  |     |          | 1    | -0.4090  | 0.4628         | 184 | -0.88   | 0.3780  |
| Dose                               |     |          | 0.1  |     |          | 6    | -0.2141  | 0.4627         | 184 | -0.46   | 0.6442  |
| Dose                               |     |          | 0.1  |     |          | 0    | 0.1680   | 0.4653         | 188 | 0.36    | 0.7185  |
| Dose                               |     |          | 1    |     |          | 6    | 0.1949   | 0.4598         | 181 | 0.42    | 0.6722  |
| Dose                               |     |          | 1    |     |          | 0    | 0.5770   | 0.4625         | 185 | 1.25    | 0.2138  |
| Dose                               |     |          | 6    |     |          | 0    | 0.3821   | 0.4624         | 184 | 0.83    | 0.4097  |

**Mixed Effects Model for dendrite length sum****The Mixed Procedure**

| Solution for Fixed Effects |     |          |      |          |                |     |         |         |       |          |         |
|----------------------------|-----|----------|------|----------|----------------|-----|---------|---------|-------|----------|---------|
| Effect                     | Sex | Genotype | Dose | Estimate | Standard Error | DF  | t Value | Pr >  t | Alpha | Lower    | Upper   |
| Intercept                  |     |          |      | 857.44   | 35.6230        | 188 | 24.07   | <.0001  | 0.05  | 787.16   | 927.71  |
| Sex                        | F   |          |      | 11.2111  | 25.0221        | 184 | 0.45    | 0.6546  | 0.05  | -38.1567 | 60.5789 |
| Sex                        | M   |          |      | 0        | .              | .   | .       | .       | .     | .        | .       |
| Genotype                   |     | CG       |      | 9.0551   | 35.3309        | 183 | 0.26    | 0.7980  | 0.05  | -60.6532 | 78.7634 |
| Genotype                   |     | DM       |      | -17.7112 | 35.5299        | 186 | -0.50   | 0.6187  | 0.05  | -87.8046 | 52.3821 |
| Genotype                   |     | RY       |      | -52.4407 | 35.4128        | 184 | -1.48   | 0.1404  | 0.05  | -122.31  | 17.4255 |
| Genotype                   |     | WT       |      | 0        | .              | .   | .       | .       | .     | .        | .       |
| Dose                       |     |          | 0.1  | 33.6612  | 35.5562        | 187 | 0.95    | 0.3450  | 0.05  | -36.4828 | 103.81  |
| Dose                       |     |          | 1    | 53.3977  | 35.3775        | 184 | 1.51    | 0.1329  | 0.05  | -16.4007 | 123.20  |
| Dose                       |     |          | 6    | 36.5092  | 35.3757        | 184 | 1.03    | 0.3034  | 0.05  | -33.2860 | 106.30  |
| Dose                       |     |          | 0    | 0        | .              | .   | .       | .       | .     | .        | .       |

| Type 3 Tests of Fixed Effects |        |        |         |        |
|-------------------------------|--------|--------|---------|--------|
| Effect                        | Num DF | Den DF | F Value | Pr > F |
| Sex                           | 1      | 184    | 0.20    | 0.6546 |
| Genotype                      | 3      | 184    | 1.18    | 0.3173 |
| Dose                          | 3      | 184    | 0.80    | 0.4970 |

| Least Squares Means |     |          |      |          |                |
|---------------------|-----|----------|------|----------|----------------|
| Effect              | Sex | Genotype | Dose | Estimate | Standard Error |
| Sex                 | F   |          |      | 884.26   | 17.6352        |
| Sex                 | M   |          |      | 873.05   | 17.7523        |
| Genotype            |     | CG       |      | 902.99   | 24.8627        |
| Genotype            |     | DM       |      | 876.22   | 25.1457        |
| Genotype            |     | RY       |      | 841.49   | 24.9794        |
| Genotype            |     | WT       |      | 893.93   | 25.1024        |
| Dose                |     |          | 0.1  | 881.43   | 25.1579        |
| Dose                |     |          | 1    | 901.16   | 24.9033        |

***Mixed Effects Model for dendrite length sum******The Mixed Procedure***

| Least Squares Means |     |          |      |          |                |
|---------------------|-----|----------|------|----------|----------------|
| Effect              | Sex | Genotype | Dose | Estimate | Standard Error |
| Dose                |     |          | 6    | 884.28   | 24.9015        |
| Dose                |     |          | 0    | 847.77   | 25.1276        |

| Differences of Least Squares Means |     |          |      |     |          |      |          |                |     |         |         |
|------------------------------------|-----|----------|------|-----|----------|------|----------|----------------|-----|---------|---------|
| Effect                             | Sex | Genotype | Dose | Sex | Genotype | Dose | Estimate | Standard Error | DF  | t Value | Pr >  t |
| Sex                                | F   |          |      | M   |          |      | 11.2111  | 25.0221        | 184 | 0.45    | 0.6546  |
| Genotype                           |     | CG       |      |     | DM       |      | 26.7664  | 35.3618        | 183 | 0.76    | 0.4501  |
| Genotype                           |     | CG       |      |     | RY       |      | 61.4958  | 35.2442        | 181 | 1.74    | 0.0827  |
| Genotype                           |     | CG       |      |     | WT       |      | 9.0551   | 35.3309        | 183 | 0.26    | 0.7980  |
| Genotype                           |     | DM       |      |     | RY       |      | 34.7295  | 35.4431        | 184 | 0.98    | 0.3284  |
| Genotype                           |     | DM       |      |     | WT       |      | -17.7112 | 35.5299        | 186 | -0.50   | 0.6187  |
| Genotype                           |     | RY       |      |     | WT       |      | -52.4407 | 35.4128        | 184 | -1.48   | 0.1404  |
| Dose                               |     |          | 0.1  |     |          | 1    | -19.7365 | 35.3989        | 184 | -0.56   | 0.5778  |
| Dose                               |     |          | 0.1  |     |          | 6    | -2.8481  | 35.3972        | 184 | -0.08   | 0.9360  |
| Dose                               |     |          | 0.1  |     |          | 0    | 33.6612  | 35.5562        | 187 | 0.95    | 0.3450  |
| Dose                               |     |          | 1    |     |          | 6    | 16.8885  | 35.2177        | 181 | 0.48    | 0.6321  |
| Dose                               |     |          | 1    |     |          | 0    | 53.3977  | 35.3775        | 184 | 1.51    | 0.1329  |
| Dose                               |     |          | 6    |     |          | 0    | 36.5092  | 35.3757        | 184 | 1.03    | 0.3034  |

**Mixed model for cell body area****The Mixed Procedure**

| Solution for Fixed Effects |     |          |      |          |                |     |         |         |       |          |          |
|----------------------------|-----|----------|------|----------|----------------|-----|---------|---------|-------|----------|----------|
| Effect                     | Sex | Genotype | Dose | Estimate | Standard Error | DF  | t Value | Pr >  t | Alpha | Lower    | Upper    |
| Intercept                  |     |          |      | 291.17   | 11.2507        | 187 | 25.88   | <.0001  | 0.05  | 268.97   | 313.36   |
| Sex                        | F   |          |      | 9.2350   | 5.3625         | 175 | 1.72    | 0.0868  | 0.05  | -1.3482  | 19.8182  |
| Sex                        | M   |          |      | 0        | .              | .   | .       | .       | .     | .        | .        |
| Genotype                   |     | CG       |      | -26.4546 | 15.2232        | 178 | -1.74   | 0.0840  | 0.05  | -56.4956 | 3.5864   |
| Genotype                   |     | DM       |      | -61.3191 | 15.3539        | 183 | -3.99   | <.0001  | 0.05  | -91.6121 | -31.0260 |
| Genotype                   |     | RY       |      | -53.0510 | 15.3287        | 183 | -3.46   | 0.0007  | 0.05  | -83.2951 | -22.8068 |
| Genotype                   |     | WT       |      | 0        | .              | .   | .       | .       | .     | .        | .        |
| Dose                       |     |          | 0.1  | -22.6638 | 15.3565        | 184 | -1.48   | 0.1417  | 0.05  | -52.9610 | 7.6334   |
| Dose                       |     |          | 1    | -19.0021 | 15.2795        | 180 | -1.24   | 0.2152  | 0.05  | -49.1515 | 11.1474  |
| Dose                       |     |          | 6    | -55.1461 | 15.2381        | 179 | -3.62   | 0.0004  | 0.05  | -85.2158 | -25.0763 |
| Dose                       |     |          | 0    | 0        | .              | .   | .       | .       | .     | .        | .        |
| Genotype*Dose              |     | CG       | 0.1  | 9.0472   | 21.5218        | 178 | 0.42    | 0.6747  | 0.05  | -33.4232 | 51.5177  |
| Genotype*Dose              |     | CG       | 1    | 7.3856   | 21.4762        | 177 | 0.34    | 0.7313  | 0.05  | -34.9972 | 49.7684  |
| Genotype*Dose              |     | CG       | 6    | 50.5248  | 21.3595        | 173 | 2.37    | 0.0191  | 0.05  | 8.3663   | 92.6834  |
| Genotype*Dose              |     | CG       | 0    | 0        | .              | .   | .       | .       | .     | .        | .        |
| Genotype*Dose              |     | DM       | 0.1  | 25.7651  | 21.7132        | 182 | 1.19    | 0.2369  | 0.05  | -17.0767 | 68.6068  |
| Genotype*Dose              |     | DM       | 1    | 7.2045   | 21.5358        | 178 | 0.33    | 0.7384  | 0.05  | -35.2934 | 49.7025  |
| Genotype*Dose              |     | DM       | 6    | 82.0220  | 21.5530        | 179 | 3.81    | 0.0002  | 0.05  | 39.4911  | 124.55   |
| Genotype*Dose              |     | DM       | 0    | 0        | .              | .   | .       | .       | .     | .        | .        |
| Genotype*Dose              |     | RY       | 0.1  | 20.8641  | 21.6054        | 181 | 0.97    | 0.3355  | 0.05  | -21.7673 | 63.4954  |
| Genotype*Dose              |     | RY       | 1    | 9.4661   | 21.4855        | 177 | 0.44    | 0.6601  | 0.05  | -32.9350 | 51.8672  |
| Genotype*Dose              |     | RY       | 6    | 47.2453  | 21.5244        | 178 | 2.19    | 0.0295  | 0.05  | 4.7692   | 89.7215  |
| Genotype*Dose              |     | RY       | 0    | 0        | .              | .   | .       | .       | .     | .        | .        |
| Genotype*Dose              |     | WT       | 0.1  | 0        | .              | .   | .       | .       | .     | .        | .        |
| Genotype*Dose              |     | WT       | 1    | 0        | .              | .   | .       | .       | .     | .        | .        |
| Genotype*Dose              |     | WT       | 6    | 0        | .              | .   | .       | .       | .     | .        | .        |
| Genotype*Dose              |     | WT       | 0    | 0        | .              | .   | .       | .       | .     | .        | .        |

*Mixed model for cell body area**The Mixed Procedure*

| Type 3 Tests of Fixed Effects |           |           |         |        |
|-------------------------------|-----------|-----------|---------|--------|
| Effect                        | Num<br>DF | Den<br>DF | F Value | Pr > F |
| Sex                           | 1         | 175       | 2.97    | 0.0868 |
| Genotype                      | 3         | 175       | 9.78    | <.0001 |
| Dose                          | 3         | 175       | 1.09    | 0.3550 |
| Genotype*Dose                 | 9         | 175       | 2.10    | 0.0322 |

| Least Squares Means |     |          |      |          |                   |
|---------------------|-----|----------|------|----------|-------------------|
| Effect              | Sex | Genotype | Dose | Estimate | Standard<br>Error |
| Sex                 | F   |          |      | 257.21   | 3.7783            |
| Sex                 | M   |          |      | 247.98   | 3.8054            |
| Genotype            |     | CG       |      | 261.87   | 5.3252            |
| Genotype            |     | DM       |      | 239.01   | 5.3905            |
| Genotype            |     | RY       |      | 237.93   | 5.3523            |
| Genotype            |     | WT       |      | 271.58   | 5.3817            |
| Dose                |     |          | 0.1  | 251.83   | 5.3935            |
| Dose                |     |          | 1    | 247.59   | 5.3346            |
| Dose                |     |          | 6    | 250.38   | 5.3342            |
| Dose                |     |          | 0    | 260.58   | 5.3874            |
| Genotype*Dose       |     | CG       | 0.1  | 255.71   | 10.7080           |
| Genotype*Dose       |     | CG       | 1    | 257.71   | 10.7260           |
| Genotype*Dose       |     | CG       | 6    | 264.71   | 10.5509           |
| Genotype*Dose       |     | CG       | 0    | 269.33   | 10.6162           |
| Genotype*Dose       |     | DM       | 0.1  | 237.57   | 10.9063           |
| Genotype*Dose       |     | DM       | 1    | 222.67   | 10.6597           |
| Genotype*Dose       |     | DM       | 6    | 261.34   | 10.7527           |
| Genotype*Dose       |     | DM       | 0    | 234.47   | 10.8036           |
| Genotype*Dose       |     | RY       | 0.1  | 240.93   | 10.7259           |
| Genotype*Dose       |     | RY       | 1    | 233.20   | 10.5937           |
| Genotype*Dose       |     | RY       | 6    | 234.83   | 10.7313           |
| Genotype*Dose       |     | RY       | 0    | 242.73   | 10.7670           |
| Genotype*Dose       |     | WT       | 0.1  | 273.12   | 10.8066           |
| Genotype*Dose       |     | WT       | 1    | 276.78   | 10.6967           |

*Mixed model for cell body area**The Mixed Procedure*

| Least Squares Means |     |          |      |          |                |
|---------------------|-----|----------|------|----------|----------------|
| Effect              | Sex | Genotype | Dose | Estimate | Standard Error |
| Genotype*Dose       |     | WT       | 6    | 240.64   | 10.6378        |
| Genotype*Dose       |     | WT       | 0    | 295.79   | 10.9105        |

| Differences of Least Squares Means |     |          |      |     |          |      |          |                |     |         |         |
|------------------------------------|-----|----------|------|-----|----------|------|----------|----------------|-----|---------|---------|
| Effect                             | Sex | Genotype | Dose | Sex | Genotype | Dose | Estimate | Standard Error | DF  | t Value | Pr >  t |
| Sex                                | F   |          |      | M   |          |      | 9.2350   | 5.3625         | 175 | 1.72    | 0.0868  |
| Genotype                           |     | CG       |      |     | DM       |      | 22.8560  | 7.5773         | 175 | 3.02    | 0.0029  |
| Genotype                           |     | CG       |      |     | RY       |      | 23.9419  | 7.5502         | 173 | 3.17    | 0.0018  |
| Genotype                           |     | CG       |      |     | WT       |      | -9.7152  | 7.5710         | 175 | -1.28   | 0.2011  |
| Genotype                           |     | DM       |      |     | RY       |      | 1.0859   | 7.5963         | 176 | 0.14    | 0.8865  |
| Genotype                           |     | DM       |      |     | WT       |      | -32.5712 | 7.6170         | 178 | -4.28   | <.0001  |
| Genotype                           |     | RY       |      |     | WT       |      | -33.6571 | 7.5901         | 176 | -4.43   | <.0001  |
| Dose                               |     |          | 0.1  |     |          | 1    | 4.2433   | 7.5859         | 176 | 0.56    | 0.5766  |
| Dose                               |     |          | 0.1  |     |          | 6    | 1.4533   | 7.5857         | 175 | 0.19    | 0.8483  |
| Dose                               |     |          | 0.1  |     |          | 0    | -8.7447  | 7.6231         | 178 | -1.15   | 0.2529  |
| Dose                               |     |          | 1    |     |          | 6    | -2.7900  | 7.5440         | 173 | -0.37   | 0.7120  |
| Dose                               |     |          | 1    |     |          | 0    | -12.9880 | 7.5816         | 176 | -1.71   | 0.0885  |
| Dose                               |     |          | 6    |     |          | 0    | -10.1980 | 7.5814         | 175 | -1.35   | 0.1803  |
| Genotype*Dose                      |     | CG       | 0.1  |     | CG       | 1    | -2.0001  | 15.1561        | 176 | -0.13   | 0.8952  |
| Genotype*Dose                      |     | CG       | 0.1  |     | CG       | 6    | -8.9953  | 15.0327        | 170 | -0.60   | 0.5504  |
| Genotype*Dose                      |     | CG       | 0.1  |     | CG       | 0    | -13.6166 | 15.0786        | 172 | -0.90   | 0.3678  |
| Genotype*Dose                      |     | CG       | 0.1  |     | DM       | 0.1  | 18.1466  | 15.2842        | 178 | 1.19    | 0.2367  |
| Genotype*Dose                      |     | CG       | 0.1  |     | DM       | 1    | 33.0455  | 15.1092        | 174 | 2.19    | 0.0301  |
| Genotype*Dose                      |     | CG       | 0.1  |     | DM       | 6    | -5.6281  | 15.1750        | 177 | -0.37   | 0.7112  |
| Genotype*Dose                      |     | CG       | 0.1  |     | DM       | 0    | 21.2479  | 15.2111        | 177 | 1.40    | 0.1642  |
| Genotype*Dose                      |     | CG       | 0.1  |     | RY       | 0.1  | 14.7795  | 15.1561        | 176 | 0.98    | 0.3308  |
| Genotype*Dose                      |     | CG       | 0.1  |     | RY       | 1    | 22.5158  | 15.0628        | 172 | 1.49    | 0.1368  |
| Genotype*Dose                      |     | CG       | 0.1  |     | RY       | 6    | 20.8805  | 15.1598        | 175 | 1.38    | 0.1702  |
| Genotype*Dose                      |     | CG       | 0.1  |     | RY       | 0    | 12.9798  | 15.1851        | 177 | 0.85    | 0.3938  |
| Genotype*Dose                      |     | CG       | 0.1  |     | WT       | 0.1  | -17.4074 | 15.2132        | 178 | -1.14   | 0.2541  |
| Genotype*Dose                      |     | CG       | 0.1  |     | WT       | 1    | -21.0691 | 15.1354        | 175 | -1.39   | 0.1657  |

*Mixed model for cell body area**The Mixed Procedure*

| Differences of Least Squares Means |     |          |      |     |          |      |          |                |     |         |         |
|------------------------------------|-----|----------|------|-----|----------|------|----------|----------------|-----|---------|---------|
| Effect                             | Sex | Genotype | Dose | Sex | Genotype | Dose | Estimate | Standard Error | DF  | t Value | Pr >  t |
| Genotype*Dose                      |     | CG       | 0.1  |     | WT       | 6    | 15.0749  | 15.0938        | 173 | 1.00    | 0.3193  |
| Genotype*Dose                      |     | CG       | 0.1  |     | WT       | 0    | -40.0712 | 15.2872        | 181 | -2.62   | 0.0095  |
| Genotype*Dose                      |     | CG       | 1    |     | CG       | 6    | -6.9953  | 15.0456        | 171 | -0.46   | 0.6426  |
| Genotype*Dose                      |     | CG       | 1    |     | CG       | 0    | -11.6165 | 15.0914        | 173 | -0.77   | 0.4425  |
| Genotype*Dose                      |     | CG       | 1    |     | DM       | 0.1  | 20.1467  | 15.2966        | 179 | 1.32    | 0.1895  |
| Genotype*Dose                      |     | CG       | 1    |     | DM       | 1    | 35.0455  | 15.1220        | 174 | 2.32    | 0.0216  |
| Genotype*Dose                      |     | CG       | 1    |     | DM       | 6    | -3.6280  | 15.1879        | 177 | -0.24   | 0.8115  |
| Genotype*Dose                      |     | CG       | 1    |     | DM       | 0    | 23.2480  | 15.2236        | 178 | 1.53    | 0.1285  |
| Genotype*Dose                      |     | CG       | 1    |     | RY       | 0.1  | 16.7796  | 15.1688        | 176 | 1.11    | 0.2702  |
| Genotype*Dose                      |     | CG       | 1    |     | RY       | 1    | 24.5159  | 15.0755        | 172 | 1.63    | 0.1057  |
| Genotype*Dose                      |     | CG       | 1    |     | RY       | 6    | 22.8806  | 15.1724        | 176 | 1.51    | 0.1333  |
| Genotype*Dose                      |     | CG       | 1    |     | RY       | 0    | 14.9799  | 15.1979        | 177 | 0.99    | 0.3256  |
| Genotype*Dose                      |     | CG       | 1    |     | WT       | 0.1  | -15.4073 | 15.2259        | 179 | -1.01   | 0.3129  |
| Genotype*Dose                      |     | CG       | 1    |     | WT       | 1    | -19.0690 | 15.1482        | 175 | -1.26   | 0.2098  |
| Genotype*Dose                      |     | CG       | 1    |     | WT       | 6    | 17.0750  | 15.1066        | 174 | 1.13    | 0.2599  |
| Genotype*Dose                      |     | CG       | 1    |     | WT       | 0    | -38.0711 | 15.2997        | 182 | -2.49   | 0.0137  |
| Genotype*Dose                      |     | CG       | 6    |     | CG       | 0    | -4.6212  | 14.9675        | 167 | -0.31   | 0.7579  |
| Genotype*Dose                      |     | CG       | 6    |     | DM       | 0.1  | 27.1420  | 15.1747        | 173 | 1.79    | 0.0754  |
| Genotype*Dose                      |     | CG       | 6    |     | DM       | 1    | 42.0408  | 14.9984        | 169 | 2.80    | 0.0057  |
| Genotype*Dose                      |     | CG       | 6    |     | DM       | 6    | 3.3673   | 15.0646        | 172 | 0.22    | 0.8234  |
| Genotype*Dose                      |     | CG       | 6    |     | DM       | 0    | 30.2432  | 15.1010        | 173 | 2.00    | 0.0468  |
| Genotype*Dose                      |     | CG       | 6    |     | RY       | 0.1  | 23.7748  | 15.0455        | 171 | 1.58    | 0.1159  |
| Genotype*Dose                      |     | CG       | 6    |     | RY       | 1    | 31.5111  | 14.9516        | 167 | 2.11    | 0.0366  |
| Genotype*Dose                      |     | CG       | 6    |     | RY       | 6    | 29.8758  | 15.0494        | 170 | 1.99    | 0.0487  |
| Genotype*Dose                      |     | CG       | 6    |     | RY       | 0    | 21.9751  | 15.0748        | 172 | 1.46    | 0.1467  |
| Genotype*Dose                      |     | CG       | 6    |     | WT       | 0.1  | -8.4120  | 15.1031        | 173 | -0.56   | 0.5783  |
| Genotype*Dose                      |     | CG       | 6    |     | WT       | 1    | -12.0738 | 15.0247        | 170 | -0.80   | 0.4228  |
| Genotype*Dose                      |     | CG       | 6    |     | WT       | 6    | 24.0702  | 14.9829        | 168 | 1.61    | 0.1100  |
| Genotype*Dose                      |     | CG       | 6    |     | WT       | 0    | -31.0758 | 15.1777        | 176 | -2.05   | 0.0421  |
| Genotype*Dose                      |     | CG       | 0    |     | DM       | 0.1  | 31.7632  | 15.2202        | 175 | 2.09    | 0.0383  |
| Genotype*Dose                      |     | CG       | 0    |     | DM       | 1    | 46.6620  | 15.0444        | 171 | 3.10    | 0.0023  |
| Genotype*Dose                      |     | CG       | 0    |     | DM       | 6    | 7.9885   | 15.1103        | 174 | 0.53    | 0.5977  |

*Mixed model for cell body area**The Mixed Procedure*

| Differences of Least Squares Means |     |          |      |     |          |      |          |                |     |         |         |
|------------------------------------|-----|----------|------|-----|----------|------|----------|----------------|-----|---------|---------|
| Effect                             | Sex | Genotype | Dose | Sex | Genotype | Dose | Estimate | Standard Error | DF  | t Value | Pr >  t |
| Genotype*Dose                      |     | CG       | 0    |     | DM       | 0    | 34.8645  | 15.1468        | 175 | 2.30    | 0.0225  |
| Genotype*Dose                      |     | CG       | 0    |     | RY       | 0.1  | 28.3961  | 15.0913        | 173 | 1.88    | 0.0616  |
| Genotype*Dose                      |     | CG       | 0    |     | RY       | 1    | 36.1323  | 14.9977        | 169 | 2.41    | 0.0171  |
| Genotype*Dose                      |     | CG       | 0    |     | RY       | 6    | 34.4971  | 15.0952        | 172 | 2.29    | 0.0235  |
| Genotype*Dose                      |     | CG       | 0    |     | RY       | 0    | 26.5963  | 15.1205        | 174 | 1.76    | 0.0803  |
| Genotype*Dose                      |     | CG       | 0    |     | WT       | 0.1  | -3.7908  | 15.1488        | 175 | -0.25   | 0.8027  |
| Genotype*Dose                      |     | CG       | 0    |     | WT       | 1    | -7.4525  | 15.0705        | 172 | -0.49   | 0.6216  |
| Genotype*Dose                      |     | CG       | 0    |     | WT       | 6    | 28.6915  | 15.0289        | 170 | 1.91    | 0.0579  |
| Genotype*Dose                      |     | CG       | 0    |     | WT       | 0    | -26.4546 | 15.2232        | 178 | -1.74   | 0.0840  |
| Genotype*Dose                      |     | DM       | 0.1  |     | DM       | 1    | 14.8988  | 15.2502        | 176 | 0.98    | 0.3299  |
| Genotype*Dose                      |     | DM       | 0.1  |     | DM       | 6    | -23.7747 | 15.3160        | 179 | -1.55   | 0.1224  |
| Genotype*Dose                      |     | DM       | 0.1  |     | DM       | 0    | 3.1013   | 15.3506        | 180 | 0.20    | 0.8401  |
| Genotype*Dose                      |     | DM       | 0.1  |     | RY       | 0.1  | -3.3671  | 15.2969        | 179 | -0.22   | 0.8260  |
| Genotype*Dose                      |     | DM       | 0.1  |     | RY       | 1    | 4.3691   | 15.2041        | 174 | 0.29    | 0.7742  |
| Genotype*Dose                      |     | DM       | 0.1  |     | RY       | 6    | 2.7339   | 15.3001        | 178 | 0.18    | 0.8584  |
| Genotype*Dose                      |     | DM       | 0.1  |     | RY       | 0    | -5.1668  | 15.3258        | 179 | -0.34   | 0.7364  |
| Genotype*Dose                      |     | DM       | 0.1  |     | WT       | 0.1  | -35.5540 | 15.3535        | 181 | -2.32   | 0.0217  |
| Genotype*Dose                      |     | DM       | 0.1  |     | WT       | 1    | -39.2157 | 15.2766        | 177 | -2.57   | 0.0111  |
| Genotype*Dose                      |     | DM       | 0.1  |     | WT       | 6    | -3.0717  | 15.2351        | 176 | -0.20   | 0.8404  |
| Genotype*Dose                      |     | DM       | 0.1  |     | WT       | 0    | -58.2178 | 15.4263        | 184 | -3.77   | 0.0002  |
| Genotype*Dose                      |     | DM       | 1    |     | DM       | 6    | -38.6735 | 15.1411        | 175 | -2.55   | 0.0115  |
| Genotype*Dose                      |     | DM       | 1    |     | DM       | 0    | -11.7975 | 15.1770        | 176 | -0.78   | 0.4380  |
| Genotype*Dose                      |     | DM       | 1    |     | RY       | 0.1  | -18.2659 | 15.1220        | 174 | -1.21   | 0.2287  |
| Genotype*Dose                      |     | DM       | 1    |     | RY       | 1    | -10.5297 | 15.0284        | 170 | -0.70   | 0.4845  |
| Genotype*Dose                      |     | DM       | 1    |     | RY       | 6    | -12.1649 | 15.1257        | 174 | -0.80   | 0.4223  |
| Genotype*Dose                      |     | DM       | 1    |     | RY       | 0    | -20.0657 | 15.1511        | 175 | -1.32   | 0.1871  |
| Genotype*Dose                      |     | DM       | 1    |     | WT       | 0.1  | -50.4528 | 15.1793        | 177 | -3.32   | 0.0011  |
| Genotype*Dose                      |     | DM       | 1    |     | WT       | 1    | -54.1146 | 15.1013        | 173 | -3.58   | 0.0004  |
| Genotype*Dose                      |     | DM       | 1    |     | WT       | 6    | -17.9706 | 15.0596        | 171 | -1.19   | 0.2344  |
| Genotype*Dose                      |     | DM       | 1    |     | WT       | 0    | -73.1166 | 15.2533        | 179 | -4.79   | <.0001  |
| Genotype*Dose                      |     | DM       | 6    |     | DM       | 0    | 26.8760  | 15.2429        | 179 | 1.76    | 0.0796  |
| Genotype*Dose                      |     | DM       | 6    |     | RY       | 0.1  | 20.4076  | 15.1877        | 177 | 1.34    | 0.1808  |



*Mixed model for cell body area**The Mixed Procedure*

| Differences of Least Squares Means |     |          |      |     |          |      |          |                |     |         |         |
|------------------------------------|-----|----------|------|-----|----------|------|----------|----------------|-----|---------|---------|
| Effect                             | Sex | Genotype | Dose | Sex | Genotype | Dose | Estimate | Standard Error | DF  | t Value | Pr >  t |
| Genotype*Dose                      |     | DM       | 6    |     | RY       | 1    | 28.1438  | 15.0947        | 173 | 1.86    | 0.0639  |
| Genotype*Dose                      |     | DM       | 6    |     | RY       | 6    | 26.5086  | 15.1917        | 177 | 1.74    | 0.0827  |
| Genotype*Dose                      |     | DM       | 6    |     | RY       | 0    | 18.6078  | 15.2167        | 178 | 1.22    | 0.2230  |
| Genotype*Dose                      |     | DM       | 6    |     | WT       | 0.1  | -11.7793 | 15.2448        | 180 | -0.77   | 0.4407  |
| Genotype*Dose                      |     | DM       | 6    |     | WT       | 1    | -15.4410 | 15.1670        | 176 | -1.02   | 0.3100  |
| Genotype*Dose                      |     | DM       | 6    |     | WT       | 6    | 20.7030  | 15.1257        | 174 | 1.37    | 0.1728  |
| Genotype*Dose                      |     | DM       | 6    |     | WT       | 0    | -34.4431 | 15.3188        | 182 | -2.25   | 0.0257  |
| Genotype*Dose                      |     | DM       | 0    |     | RY       | 0.1  | -6.4684  | 15.2238        | 178 | -0.42   | 0.6714  |
| Genotype*Dose                      |     | DM       | 0    |     | RY       | 1    | 1.2679   | 15.1307        | 174 | 0.08    | 0.9333  |
| Genotype*Dose                      |     | DM       | 0    |     | RY       | 6    | -0.3674  | 15.2271        | 178 | -0.02   | 0.9808  |
| Genotype*Dose                      |     | DM       | 0    |     | RY       | 0    | -8.2681  | 15.2528        | 179 | -0.54   | 0.5884  |
| Genotype*Dose                      |     | DM       | 0    |     | WT       | 0.1  | -38.6553 | 15.2807        | 181 | -2.53   | 0.0123  |
| Genotype*Dose                      |     | DM       | 0    |     | WT       | 1    | -42.3170 | 15.2034        | 177 | -2.78   | 0.0060  |
| Genotype*Dose                      |     | DM       | 0    |     | WT       | 6    | -6.1730  | 15.1617        | 175 | -0.41   | 0.6844  |
| Genotype*Dose                      |     | DM       | 0    |     | WT       | 0    | -61.3191 | 15.3539        | 183 | -3.99   | <.0001  |
| Genotype*Dose                      |     | RY       | 0.1  |     | RY       | 1    | 7.7363   | 15.0756        | 172 | 0.51    | 0.6085  |
| Genotype*Dose                      |     | RY       | 0.1  |     | RY       | 6    | 6.1010   | 15.1726        | 176 | 0.40    | 0.6881  |
| Genotype*Dose                      |     | RY       | 0.1  |     | RY       | 0    | -1.7997  | 15.1978        | 177 | -0.12   | 0.9059  |
| Genotype*Dose                      |     | RY       | 0.1  |     | WT       | 0.1  | -32.1869 | 15.2259        | 179 | -2.11   | 0.0359  |
| Genotype*Dose                      |     | RY       | 0.1  |     | WT       | 1    | -35.8486 | 15.1481        | 175 | -2.37   | 0.0190  |
| Genotype*Dose                      |     | RY       | 0.1  |     | WT       | 6    | 0.2954   | 15.1066        | 174 | 0.02    | 0.9844  |
| Genotype*Dose                      |     | RY       | 0.1  |     | WT       | 0    | -54.8507 | 15.2999        | 182 | -3.59   | 0.0004  |
| Genotype*Dose                      |     | RY       | 1    |     | RY       | 6    | -1.6353  | 15.0792        | 172 | -0.11   | 0.9138  |
| Genotype*Dose                      |     | RY       | 1    |     | RY       | 0    | -9.5360  | 15.1048        | 173 | -0.63   | 0.5287  |
| Genotype*Dose                      |     | RY       | 1    |     | WT       | 0.1  | -39.9231 | 15.1330        | 175 | -2.64   | 0.0091  |
| Genotype*Dose                      |     | RY       | 1    |     | WT       | 1    | -43.5849 | 15.0548        | 171 | -2.90   | 0.0043  |
| Genotype*Dose                      |     | RY       | 1    |     | WT       | 6    | -7.4409  | 15.0130        | 169 | -0.50   | 0.6208  |
| Genotype*Dose                      |     | RY       | 1    |     | WT       | 0    | -62.5869 | 15.2073        | 177 | -4.12   | <.0001  |
| Genotype*Dose                      |     | RY       | 6    |     | RY       | 0    | -7.9007  | 15.2016        | 177 | -0.52   | 0.6039  |
| Genotype*Dose                      |     | RY       | 6    |     | WT       | 0.1  | -38.2879 | 15.2297        | 178 | -2.51   | 0.0128  |
| Genotype*Dose                      |     | RY       | 6    |     | WT       | 1    | -41.9496 | 15.1520        | 175 | -2.77   | 0.0062  |
| Genotype*Dose                      |     | RY       | 6    |     | WT       | 6    | -5.8056  | 15.1103        | 173 | -0.38   | 0.7013  |

*Mixed model for cell body area**The Mixed Procedure*

| Differences of Least Squares Means |     |          |      |     |          |      |          |                |     |         |         |
|------------------------------------|-----|----------|------|-----|----------|------|----------|----------------|-----|---------|---------|
| Effect                             | Sex | Genotype | Dose | Sex | Genotype | Dose | Estimate | Standard Error | DF  | t Value | Pr >  t |
| Genotype*Dose                      |     | RY       | 6    |     | WT       | 0    | -60.9517 | 15.3033        | 181 | -3.98   | <.0001  |
| Genotype*Dose                      |     | RY       | 0    |     | WT       | 0.1  | -30.3872 | 15.2548        | 180 | -1.99   | 0.0479  |
| Genotype*Dose                      |     | RY       | 0    |     | WT       | 1    | -34.0489 | 15.1771        | 176 | -2.24   | 0.0261  |
| Genotype*Dose                      |     | RY       | 0    |     | WT       | 6    | 2.0951   | 15.1358        | 175 | 0.14    | 0.8901  |
| Genotype*Dose                      |     | RY       | 0    |     | WT       | 0    | -53.0510 | 15.3287        | 183 | -3.46   | 0.0007  |
| Genotype*Dose                      |     | WT       | 0.1  |     | WT       | 1    | -3.6617  | 15.2053        | 178 | -0.24   | 0.8100  |
| Genotype*Dose                      |     | WT       | 0.1  |     | WT       | 6    | 32.4823  | 15.1640        | 176 | 2.14    | 0.0336  |
| Genotype*Dose                      |     | WT       | 0.1  |     | WT       | 0    | -22.6638 | 15.3565        | 184 | -1.48   | 0.1417  |
| Genotype*Dose                      |     | WT       | 1    |     | WT       | 6    | 36.1440  | 15.0859        | 172 | 2.40    | 0.0177  |
| Genotype*Dose                      |     | WT       | 1    |     | WT       | 0    | -19.0021 | 15.2795        | 180 | -1.24   | 0.2152  |
| Genotype*Dose                      |     | WT       | 6    |     | WT       | 0    | -55.1461 | 15.2381        | 179 | -3.62   | 0.0004  |

*Mixed model for tips per dendrite**The Mixed Procedure*

| Solution for Fixed Effects |     |          |      |          |                |     |         |         |       |          |        |
|----------------------------|-----|----------|------|----------|----------------|-----|---------|---------|-------|----------|--------|
| Effect                     | Sex | Genotype | Dose | Estimate | Standard Error | DF  | t Value | Pr >  t | Alpha | Lower    | Upper  |
| Intercept                  |     |          |      | 3.9063   | 0.1211         | 186 | 32.26   | <.0001  | 0.05  | 3.6674   | 4.1452 |
| Sex                        | F   |          |      | 0.01805  | 0.08433        | 177 | 0.21    | 0.8308  | 0.05  | -0.1484  | 0.1845 |
| Sex                        | M   |          |      | 0        | .              | .   | .       | .       | .     | .        | .      |
| Genotype                   |     | CG       |      | 0.2036   | 0.1190         | 176 | 1.71    | 0.0887  | 0.05  | -0.03114 | 0.4384 |
| Genotype                   |     | DM       |      | 0.1367   | 0.1203         | 181 | 1.14    | 0.2571  | 0.05  | -0.1006  | 0.3740 |
| Genotype                   |     | RY       |      | 0.05098  | 0.1195         | 179 | 0.43    | 0.6703  | 0.05  | -0.1849  | 0.2869 |
| Genotype                   |     | WT       |      | 0        | .              | .   | .       | .       | .     | .        | .      |
| Dose                       |     |          | 0.1  | 0.1712   | 0.1205         | 182 | 1.42    | 0.1571  | 0.05  | -0.06654 | 0.4089 |
| Dose                       |     |          | 1    | 0.1504   | 0.1193         | 177 | 1.26    | 0.2089  | 0.05  | -0.08496 | 0.3858 |
| Dose                       |     |          | 6    | 0.07269  | 0.1192         | 177 | 0.61    | 0.5428  | 0.05  | -0.1626  | 0.3079 |
| Dose                       |     |          | 0    | 0        | .              | .   | .       | .       | .     | .        | .      |

| Type 3 Tests of Fixed Effects |        |        |         |        |
|-------------------------------|--------|--------|---------|--------|
| Effect                        | Num DF | Den DF | F Value | Pr > F |
| Sex                           | 1      | 177    | 0.05    | 0.8308 |
| Genotype                      | 3      | 177    | 1.15    | 0.3291 |
| Dose                          | 3      | 177    | 0.85    | 0.4688 |

| Least Squares Means |     |          |      |          |                |
|---------------------|-----|----------|------|----------|----------------|
| Effect              | Sex | Genotype | Dose | Estimate | Standard Error |
| Sex                 | F   |          |      | 4.1207   | 0.05928        |
| Sex                 | M   |          |      | 4.1027   | 0.05999        |
| Genotype            |     | CG       |      | 4.2175   | 0.08322        |
| Genotype            |     | DM       |      | 4.1506   | 0.08505        |
| Genotype            |     | RY       |      | 4.0649   | 0.08405        |
| Genotype            |     | WT       |      | 4.0139   | 0.08503        |
| Dose                |     |          | 0.1  | 4.1843   | 0.08524        |
| Dose                |     |          | 1    | 4.1636   | 0.08352        |

*Mixed model for tips per dendrite**The Mixed Procedure*

| Least Squares Means |     |          |      |          |                |
|---------------------|-----|----------|------|----------|----------------|
| Effect              | Sex | Genotype | Dose | Estimate | Standard Error |
| Dose                |     |          | 6    | 4.0858   | 0.08344        |
| Dose                |     |          | 0    | 4.0132   | 0.08515        |

| Differences of Least Squares Means |     |          |      |     |          |      |          |                |     |         |         |
|------------------------------------|-----|----------|------|-----|----------|------|----------|----------------|-----|---------|---------|
| Effect                             | Sex | Genotype | Dose | Sex | Genotype | Dose | Estimate | Standard Error | DF  | t Value | Pr >  t |
| Sex                                | F   |          |      | M   |          |      | 0.01805  | 0.08433        | 177 | 0.21    | 0.8308  |
| Genotype                           |     | CG       |      |     | DM       |      | 0.06695  | 0.1190         | 176 | 0.56    | 0.5744  |
| Genotype                           |     | CG       |      |     | RY       |      | 0.1527   | 0.1183         | 173 | 1.29    | 0.1985  |
| Genotype                           |     | CG       |      |     | WT       |      | 0.2036   | 0.1190         | 176 | 1.71    | 0.0887  |
| Genotype                           |     | DM       |      |     | RY       |      | 0.08572  | 0.1196         | 178 | 0.72    | 0.4743  |
| Genotype                           |     | DM       |      |     | WT       |      | 0.1367   | 0.1203         | 181 | 1.14    | 0.2571  |
| Genotype                           |     | RY       |      |     | WT       |      | 0.05098  | 0.1195         | 179 | 0.43    | 0.6703  |
| Dose                               |     |          | 0.1  |     |          | 1    | 0.02074  | 0.1193         | 178 | 0.17    | 0.8622  |
| Dose                               |     |          | 0.1  |     |          | 6    | 0.09847  | 0.1193         | 177 | 0.83    | 0.4102  |
| Dose                               |     |          | 0.1  |     |          | 0    | 0.1712   | 0.1205         | 182 | 1.42    | 0.1571  |
| Dose                               |     |          | 1    |     |          | 6    | 0.07773  | 0.1181         | 172 | 0.66    | 0.5112  |
| Dose                               |     |          | 1    |     |          | 0    | 0.1504   | 0.1193         | 177 | 1.26    | 0.2089  |
| Dose                               |     |          | 6    |     |          | 0    | 0.07269  | 0.1192         | 177 | 0.61    | 0.5428  |

*Mixed model for dendritic mean length**The Mixed Procedure*

| Solution for Fixed Effects |     |          |      |          |                |     |         |         |       |          |         |
|----------------------------|-----|----------|------|----------|----------------|-----|---------|---------|-------|----------|---------|
| Effect                     | Sex | Genotype | Dose | Estimate | Standard Error | DF  | t Value | Pr >  t | Alpha | Lower    | Upper   |
| Intercept                  |     |          |      | 223.33   | 10.3049        | 186 | 21.67   | <.0001  | 0.05  | 203.00   | 243.66  |
| Sex                        | F   |          |      | 6.2042   | 7.1962         | 178 | 0.86    | 0.3898  | 0.05  | -7.9964  | 20.4049 |
| Sex                        | M   |          |      | 0        | .              | .   | .       | .       | .     | .        | .       |
| Genotype                   |     | CG       |      | 14.2219  | 10.1548        | 178 | 1.40    | 0.1631  | 0.05  | -5.8176  | 34.2615 |
| Genotype                   |     | DM       |      | 16.7059  | 10.2476        | 182 | 1.63    | 0.1048  | 0.05  | -3.5135  | 36.9252 |
| Genotype                   |     | RY       |      | 1.7154   | 10.1959        | 180 | 0.17    | 0.8666  | 0.05  | -18.4036 | 21.8343 |
| Genotype                   |     | WT       |      | 0        | .              | .   | .       | .       | .     | .        | .       |
| Dose                       |     |          | 0.1  | 15.2502  | 10.2623        | 183 | 1.49    | 0.1390  | 0.05  | -4.9975  | 35.4979 |
| Dose                       |     |          | 1    | 13.1141  | 10.1770        | 179 | 1.29    | 0.1992  | 0.05  | -6.9685  | 33.1967 |
| Dose                       |     |          | 6    | 4.8605   | 10.1731        | 178 | 0.48    | 0.6334  | 0.05  | -15.2149 | 24.9358 |
| Dose                       |     |          | 0    | 0        | .              | .   | .       | .       | .     | .        | .       |

| Type 3 Tests of Fixed Effects |        |        |         |        |
|-------------------------------|--------|--------|---------|--------|
| Effect                        | Num DF | Den DF | F Value | Pr > F |
| Sex                           | 1      | 178    | 0.74    | 0.3898 |
| Genotype                      | 3      | 178    | 1.40    | 0.2453 |
| Dose                          | 3      | 178    | 0.97    | 0.4077 |

| Least Squares Means |     |          |      |          |                |
|---------------------|-----|----------|------|----------|----------------|
| Effect              | Sex | Genotype | Dose | Estimate | Standard Error |
| Sex                 | F   |          |      | 246.00   | 5.0623         |
| Sex                 | M   |          |      | 239.80   | 5.1154         |
| Genotype            |     | CG       |      | 248.96   | 7.1172         |
| Genotype            |     | DM       |      | 251.45   | 7.2498         |
| Genotype            |     | RY       |      | 236.46   | 7.1763         |
| Genotype            |     | WT       |      | 234.74   | 7.2435         |
| Dose                |     |          | 0.1  | 249.85   | 7.2610         |
| Dose                |     |          | 1    | 247.71   | 7.1387         |

*Mixed model for dendritic mean length**The Mixed Procedure*

| Least Squares Means |     |          |      |          |                |
|---------------------|-----|----------|------|----------|----------------|
| Effect              | Sex | Genotype | Dose | Estimate | Standard Error |
| Dose                |     |          | 6    | 239.46   | 7.1340         |
| Dose                |     |          | 0    | 234.60   | 7.2533         |

| Differences of Least Squares Means |     |          |      |     |          |      |          |                |     |         |         |
|------------------------------------|-----|----------|------|-----|----------|------|----------|----------------|-----|---------|---------|
| Effect                             | Sex | Genotype | Dose | Sex | Genotype | Dose | Estimate | Standard Error | DF  | t Value | Pr >  t |
| Sex                                | F   |          |      | M   |          |      | 6.2042   | 7.1962         | 178 | 0.86    | 0.3898  |
| Genotype                           |     | CG       |      |     | DM       |      | -2.4840  | 10.1596        | 177 | -0.24   | 0.8071  |
| Genotype                           |     | CG       |      |     | RY       |      | 12.5065  | 10.1075        | 175 | 1.24    | 0.2176  |
| Genotype                           |     | CG       |      |     | WT       |      | 14.2219  | 10.1548        | 178 | 1.40    | 0.1631  |
| Genotype                           |     | DM       |      |     | RY       |      | 14.9905  | 10.2001        | 179 | 1.47    | 0.1434  |
| Genotype                           |     | DM       |      |     | WT       |      | 16.7059  | 10.2476        | 182 | 1.63    | 0.1048  |
| Genotype                           |     | RY       |      |     | WT       |      | 1.7154   | 10.1959        | 180 | 0.17    | 0.8666  |
| Dose                               |     |          | 0.1  |     |          | 1    | 2.1361   | 10.1823        | 179 | 0.21    | 0.8341  |
| Dose                               |     |          | 0.1  |     |          | 6    | 10.3897  | 10.1788        | 178 | 1.02    | 0.3088  |
| Dose                               |     |          | 0.1  |     |          | 0    | 15.2502  | 10.2623        | 183 | 1.49    | 0.1390  |
| Dose                               |     |          | 1    |     |          | 6    | 8.2536   | 10.0928        | 174 | 0.82    | 0.4146  |
| Dose                               |     |          | 1    |     |          | 0    | 13.1141  | 10.1770        | 179 | 1.29    | 0.1992  |
| Dose                               |     |          | 6    |     |          | 0    | 4.8605   | 10.1731        | 178 | 0.48    | 0.6334  |

*Mixed model for Nodes**The Mixed Procedure*

| Solution for Fixed Effects |     |          |      |          |                |     |         |         |       |         |         |
|----------------------------|-----|----------|------|----------|----------------|-----|---------|---------|-------|---------|---------|
| Effect                     | Sex | Genotype | Dose | Estimate | Standard Error | DF  | t Value | Pr >  t | Alpha | Lower   | Upper   |
| Intercept                  |     |          |      | 10.7728  | 0.4052         | 189 | 26.58   | <.0001  | 0.05  | 9.9734  | 11.5721 |
| Sex                        | F   |          |      | -0.04357 | 0.2840         | 183 | -0.15   | 0.8782  | 0.05  | -0.6039 | 0.5168  |
| Sex                        | M   |          |      | 0        | .              | .   | .       | .       | .     | .       | .       |
| Genotype                   |     | CG       |      | 0.1744   | 0.4009         | 183 | 0.44    | 0.6641  | 0.05  | -0.6166 | 0.9654  |
| Genotype                   |     | DM       |      | -0.4350  | 0.4037         | 186 | -1.08   | 0.2826  | 0.05  | -1.2315 | 0.3614  |
| Genotype                   |     | RY       |      | -0.5319  | 0.4021         | 184 | -1.32   | 0.1876  | 0.05  | -1.3252 | 0.2614  |
| Genotype                   |     | WT       |      | 0        | .              | .   | .       | .       | .     | .       | .       |
| Dose                       |     |          | 0.1  | 0.3004   | 0.4041         | 187 | 0.74    | 0.4582  | 0.05  | -0.4968 | 1.0977  |
| Dose                       |     |          | 1    | 0.4991   | 0.4016         | 184 | 1.24    | 0.2155  | 0.05  | -0.2932 | 1.2914  |
| Dose                       |     |          | 6    | 0.2795   | 0.4015         | 183 | 0.70    | 0.4872  | 0.05  | -0.5127 | 1.0717  |
| Dose                       |     |          | 0    | 0        | .              | .   | .       | .       | .     | .       | .       |

| Type 3 Tests of Fixed Effects |        |        |         |        |
|-------------------------------|--------|--------|---------|--------|
| Effect                        | Num DF | Den DF | F Value | Pr > F |
| Sex                           | 1      | 183    | 0.02    | 0.8782 |
| Genotype                      | 3      | 183    | 1.44    | 0.2340 |
| Dose                          | 3      | 183    | 0.52    | 0.6680 |

| Least Squares Means |     |          |      |          |                |
|---------------------|-----|----------|------|----------|----------------|
| Effect              | Sex | Genotype | Dose | Estimate | Standard Error |
| Sex                 | F   |          |      | 10.8008  | 0.2000         |
| Sex                 | M   |          |      | 10.8444  | 0.2017         |
| Genotype            |     | CG       |      | 11.1951  | 0.2817         |
| Genotype            |     | DM       |      | 10.5857  | 0.2857         |
| Genotype            |     | RY       |      | 10.4888  | 0.2834         |
| Genotype            |     | WT       |      | 11.0207  | 0.2853         |
| Dose                |     |          | 0.1  | 10.8533  | 0.2859         |
| Dose                |     |          | 1    | 11.0519  | 0.2823         |

*Mixed model for Nodes**The Mixed Procedure*

| Least Squares Means |     |          |      |          |                |
|---------------------|-----|----------|------|----------|----------------|
| Effect              | Sex | Genotype | Dose | Estimate | Standard Error |
| Dose                |     |          | 6    | 10.8324  | 0.2822         |
| Dose                |     |          | 0    | 10.5529  | 0.2856         |

| Differences of Least Squares Means |     |          |      |     |          |      |          |                |     |         |         |
|------------------------------------|-----|----------|------|-----|----------|------|----------|----------------|-----|---------|---------|
| Effect                             | Sex | Genotype | Dose | Sex | Genotype | Dose | Estimate | Standard Error | DF  | t Value | Pr >  t |
| Sex                                | F   |          |      | M   |          |      | -0.04357 | 0.2840         | 183 | -0.15   | 0.8782  |
| Genotype                           |     | CG       |      |     | DM       |      | 0.6094   | 0.4012         | 182 | 1.52    | 0.1305  |
| Genotype                           |     | CG       |      |     | RY       |      | 0.7063   | 0.3996         | 181 | 1.77    | 0.0788  |
| Genotype                           |     | CG       |      |     | WT       |      | 0.1744   | 0.4009         | 183 | 0.44    | 0.6641  |
| Genotype                           |     | DM       |      |     | RY       |      | 0.09686  | 0.4024         | 184 | 0.24    | 0.8100  |
| Genotype                           |     | DM       |      |     | WT       |      | -0.4350  | 0.4037         | 186 | -1.08   | 0.2826  |
| Genotype                           |     | RY       |      |     | WT       |      | -0.5319  | 0.4021         | 184 | -1.32   | 0.1876  |
| Dose                               |     |          | 0.1  |     |          | 1    | -0.1987  | 0.4018         | 183 | -0.49   | 0.6216  |
| Dose                               |     |          | 0.1  |     |          | 6    | 0.02093  | 0.4018         | 183 | 0.05    | 0.9585  |
| Dose                               |     |          | 0.1  |     |          | 0    | 0.3004   | 0.4041         | 187 | 0.74    | 0.4582  |
| Dose                               |     |          | 1    |     |          | 6    | 0.2196   | 0.3992         | 180 | 0.55    | 0.5830  |
| Dose                               |     |          | 1    |     |          | 0    | 0.4991   | 0.4016         | 184 | 1.24    | 0.2155  |
| Dose                               |     |          | 6    |     |          | 0    | 0.2795   | 0.4015         | 183 | 0.70    | 0.4872  |
